# Supplementary material for: Polygenic hazard score to guide screening for aggressive prostate cancer: development and validation in large scale cohorts
Source: PubMed Central journal article supplement — BMJ. 2018 Jan 10;360:j5757. doi: 10.1136/bmj.j5757 (PMC5759091; doi:10.1136/bmj.j5757), 2018-01-10
Supplement: seit038395.ww1.pdf [file seit038395.ww1.pdf]

## Appendix 1: Supplementary methods, tables, and figures [posted as supplied by author]

### Supplementary Methods

#### Description of ProtecT Cohort (Validation Set) Selection

As part of the ProtecT study, genotyping with the iCOGS custom Illumina array was performed on cases diagnosed by PSA screening<sup>1</sup>. After quality control steps described previously, there were 1,558 cases available for analysis<sup>1</sup>. Controls with normal (<3 ng/ml) or elevated ( $\geq 3$  ng/ml) PSA were selected using the same 5-year age band as the cases and from the same GP register (1,464 analyzed after quality control; 739 with normal PSA, 725 with elevated PSA)<sup>1</sup>. Additionally, genotyping was performed for the iCOGS project on ProtecT trial participants who were selected as geographically matched controls for the UK Genetic Prostate Cancer Study (UKGPCS)<sup>1,2</sup>. This category comprised 3,395 men from ProtecT; 31 of these subsequently developed PCa after initial selection as controls and are therefore analyzed as cases in the present study.

#### PHS Model SNP Selection and Model Generation

Because prostate cancer risk increases with age<sup>3</sup> and anticipated age of developing prostate cancer is highly relevant to clinical management, we applied PHS for deriving both predicted absolute risk and potential age at PCa onset<sup>4</sup>. A univariate trend test was applied to the entire Development Set (31,747 patients x 201,043 SNPs) to assess association with case or control status. All SNPs with resulting  $p$ -values  $< 10^{-6}$  in the trend test were then entered in a forward, stepwise, greedy algorithm, to select the most predictive SNPs. In each step, logistic regression was used first to improve computational efficiency. SNPs were selected for the model only if they improved prediction of case-control status. After forward, stepwise selection, coefficients for selected SNPs were estimated using a Cox proportional hazard model to predict age at diagnosis with PCa.

#### Evaluation of Proportional Hazards Assumption

The proportionality of each selected SNP was checked by correlating their Schoenfeld residuals and PCa-free survival. In addition, Kaplan-Meier curves and the predicted values from Cox regression were overlaid on a single plot to assess for overlap that would suggest that the proportionality assumption held for the final PHS model.

#### Accounting for Potential Sampling Bias

The PHS method includes Cox proportional hazards modeling, a method ideally applied to a cohort design with unbiased samples. The Development Set here has the essential advantage of being large enough to support inquiries into modest single-SNP associations, but the contributing studies include case-control and other designs with a net effect of over-representing cases compared to the general population. This disproportionate number of cases in the Development Set would tend to overestimate the general risk of PCa and therefore underestimate the risk (among cases) attributable to a given SNP. Overall, this means our method yields a conservative estimate of SNP effect sizes in the general population<sup>5</sup>.

A Cox model was also used to test PHS prediction of age of PCa onset in the Validation Set. Here, we have the advantage of ProtecT's cohort design, and the Validation Set can be treated as a nested case-control design, with known sampling rates. The sampling weights for cases and controls were determined from the overall ProtecT numbers<sup>6</sup>, and adjustments to the Cox model were made according to previously published and validated methods<sup>7</sup> using the R 'survival' package (R version 3.2.2)<sup>8,9</sup>. Results from the adjusted model were compared to results from the simple model to see whether accounting for potential sampling bias affected PHS performance in the Validation Set.

### Calculation of Confidence Intervals for Cox prediction

Based on the variance in genotypes,  $X$ , in the Development Set and the uncertainty of the Cox parameter estimates,  $\hat{\beta}$ , we calculated 95% confidence intervals for the Cox prediction, applicable to  $\Delta$ Age and Prostate Cancer-Risk (PCaR). Assuming the genotypes distribute independently with the effect sizes on the trait of interest, we can estimate the variance of  $\hat{X}\hat{\beta}$ :

$$\text{Var}(\hat{X}\hat{\beta}) = \text{Var}(\hat{\beta})\text{Var}(\bar{X}) + \text{E}(\hat{\beta})^2\text{Var}(\bar{X}) + \text{Var}(\hat{\beta})\text{E}(\bar{X})^2$$

The 95% confidence interval of  $\hat{X}\hat{\beta}$  can then be derived accordingly, such that the confidence interval of instantaneous hazard at a given age  $T$  is:

$$\lambda_0(T) \exp(95\%CI)$$

where  $\lambda_0$  is the baseline hazard.

### Calculation of Positive Predictive Value in Validation Set

In the Validation Set, 2,555 patients had positive PSA: 1,580 were then diagnosed with PCa, while 975 were designated controls without PCa. Because genotype information was collected in more cases than controls, we matched the overall ProtecT control:case ratio<sup>6</sup> by taking a random sample of 471 cases with the 975 controls and calculating the positive predictive value of PSA testing without regard to PHS, as well as in subsets based on PHS percentile thresholds of <20<sup>th</sup>, >50<sup>th</sup>, >80<sup>th</sup>, and >95<sup>th</sup>. This process was repeated for a total of 1,000 random samples of 471 cases.

### Polygenic Risk Score Analysis using Previously Reported SNPs from GWAS

Traditional GWAS have revealed a number of SNPs associated with prostate cancer. In the present study, the PHS model was built without prior assumptions on which SNPs would be most useful and then optimized parameter estimates for prediction of age of PCa onset. However, it may also be of interest to consider the performance of a traditional polygenic risk score (PRS), built with previously published SNPs and their corresponding odds ratios (OR). We therefore conducted a post-hoc analysis, reported here.

Two recent papers together published a total of 99 SNPs associated with PCa, along with ORs<sup>14,15</sup>. Genotype data were available for 63 of those SNPs in our Validation Set. A PRS model was constructed using the log odds ratios (from published ORs) for these SNPs and the allele counts in the 6,411 men from the Validation Set. The resulting PRS was used as the sole predictor in a Cox proportional hazards model, analogous to what was done for PHS in the main manuscript. As before, statistical significance was set at alpha of 0.01.

## **Supplementary Results**

### Evaluation of Proportional Hazards Assumption

Figure A shows the correlation of Schoenfeld residuals and PCa-free survival. Additionally, Figure A demonstrates reasonable overlap of the Kaplan-Meier and Cox regression estimates of PCa-free survival in the Development Set.

### Accounting for Potential Sampling Bias

After accounting for sampling weights in an adjusted Cox model<sup>7</sup>, PHS showed similar performance, with highly significant prediction of age of onset of aggressive PCa ( $z=21.7$ ,  $p<10^{-16}$ ). The hazard ratio for high PHS men (>98<sup>th</sup> percentile) compared to average risk was 4.6 [95% CI: 4.0, 5.2]. Overall, these results confirm that sampling bias in the main results leads to a conservative estimate of PHS predictive power.

### Positive Predictive Value in Validation Set

As PHS is predictive of PCa risk, we expected it to modulate the PPV of PSA testing. Indeed, risk-stratification with PHS had considerable impact on PPV in the Validation Set. In terms of any PCa (which is what the PSA biopsy threshold was set for in ProtecT), only 18% of those with low PHS were true positives, whereas over half of those with high PHS had PCa (Figure B). A similar pattern was seen for aggressive PCa, though the absolute numbers are much lower, as is to be expected (Figure B).

### Polygenic Risk Score Analysis using Previously Reported SNPs from GWAS

The PRS calculated from 63 previously published SNPs<sup>14,15</sup> was predictive of age of aggressive PCa onset in the Validation Set ( $z=9.2$ ,  $p<10^{-16}$ , HR=1.4 [95% CI: 1.3, 1.4]), though its performance was not as good as that of PHS ( $z=11.2$ ,  $p<10^{-16}$ , HR=2.9 [2.4, 3.4]).

**Table A: Study names and participant numbers**

| Development Set      | Country   | Dates     | Source <sup>b</sup>     | Number of participants |         |                |         | Age - median (interquartile range) |                  |                  |                  | PHS - median (range) |
|----------------------|-----------|-----------|-------------------------|------------------------|---------|----------------|---------|------------------------------------|------------------|------------------|------------------|----------------------|
|                      |           |           |                         | All                    | Any PCa | Aggressive PCa | Control | All                                | Any PCa          | Aggressive PCa   | Control          |                      |
| CAPS                 | Sweden    | 2001-2003 | Population-based        | 1,817                  | 1,153   | 792            | 664     | 66.3 (60.3-72.7)                   | 65.7 (59.5-72.0) | 67.0 (60.7-73.8) | 68.5 (61.2-73.9) | 0.16 (-1.30-1.18)    |
| CPCS1                | Denmark   | 2008-2011 | Hospital recruitment    | 3,610                  | 840     | 557            | 2,770   | 62.0 (51.0-71.0)                   | 69.1 (63.7-75.0) | 69.1 (64.0-74.7) | 58.0 (46.0-68.0) | 0.02 (-2.65-1.02)    |
| CPCS2                | Denmark   | 2010-2011 | Hospital recruitment    | 1,273                  | 264     | 161            | 1,009   | 60.7 (49.0-68.7)                   | 64.5 (60.5-68.5) | 64.5 (60.6-68.4) | 58.0 (45.0-69.0) | 0.00 (-0.99-1.01)    |
| EPIC                 | EU        | 1992-2000 | Population-based        | 1,801                  | 722     | 137            | 1,079   | 61.1 (58.1-66.0)                   | 65.2 (61.3-68.7) | 65.9 (62.4-69.3) | 60.0 (56.0-63.0) | 0.08 (-1.01-1.08)    |
| EPIC-Norfolk         | UK        | 1992-2000 | Population-based        | 1,401                  | 484     | 28             | 917     | 73.2 (65.9-80.0)                   | 72.8 (66.8-77.9) | 71.3 (65.5-76.2) | 73.7 (65.2-81.5) | 0.01 (-3.79-1.20)    |
| ESTHER               | Germany   | 2000-2002 | Population-based        | 631                    | 313     | 175            | 318     | 66.0 (62.3-69.0)                   | 66.1 (62.8-68.8) | 66.2 (62.8-68.9) | 66.0 (62.0-69.0) | 0.08 (-0.99-1.14)    |
| IPO-Porto            | Portugal  | 1999-2011 | Hospital recruitment    | 242                    | 183     | 166            | 59      | 58.5 (51.9-62.5)                   | 60.7 (56.9-63.0) | 60.8 (57.0-63.0) | 34.0 (25.0-47.5) | 0.15 (-0.64-0.89)    |
| MAYO                 | USA       | 1994-2007 | Hospital recruitment    | 1,254                  | 766     | 548            | 488     | 65.4 (60.0-70.0)                   | 65.7 (61.3-69.7) | 66.2 (61.9-70.0) | 65.0 (59.0-71.5) | 0.11 (-1.07-1.53)    |
| MOFFITT              | USA       | 2002-2009 | Hospital recruitment    | 513                    | 413     | 195            | 100     | 64.0 (59.0-71.0)                   | 65.0 (59.8-71.0) | 66.0 (61.0-73.0) | 62.0 (57.0-67.0) | 0.14 (-0.72-0.97)    |
| PCMUS                | Bulgaria  | 1993-2011 | Hospital recruitment    | 291                    | 151     | 122            | 140     | 68.0 (62.0-74.0)                   | 69.3 (63.4-74.4) | 69.9 (63.5-75.4) | 67.0 (60.0-73.3) | 0.07 (-2.61-0.84)    |
| PPF-UNIS             | UK        | 1993-2011 | Hospital recruitment    | 433                    | 245     | 151            | 188     | 68.3 (62.1-73.6)                   | 69.4 (63.2-73.5) | 70.9 (65.2-75.0) | 67.2 (59.8-73.8) | 0.12 (-2.28-1.10)    |
| Poland               | Poland    | 1999-2009 | Hospital recruitment    | 790                    | 438     | 259            | 352     | 67.0 (58.0-72.0)                   | 68.0 (63.0-73.0) | 69.0 (63.0-73.8) | 62.0 (54.0-71.0) | 0.12 (-0.78-0.93)    |
| ProMPT               | UK        | 2001-2009 | Population-based        | 168                    | 166     | 130            | 2       | 65.0 (61.5-72.0)                   | 65.0 (61.4-72.0) | 66.0 (62.2-72.0) | 70.1 (65.0-75.2) | 0.14 (-0.61-0.98)    |
| QLD                  | Australia | 2004-2011 | Hospital recruitment    | 212                    | 127     | 100            | 85      | 65.8 (59.5-69.0)                   | 61.0 (57.0-66.0) | 62.0 (58.0-67.5) | 68.7 (66.4-72.5) | 0.13 (-2.74-0.98)    |
| SEARCH               | UK        | 2005-2013 | Population-based        | 2,613                  | 1,371   | 565            | 1,242   | 60.0 (54.0-65.0)                   | 64.0 (60.0-67.0) | 64.0 (61.0-67.0) | 55.0 (50.0-60.0) | 0.12 (-2.78-1.24)    |
| STHM1                | Sweden    | 2005-2007 | Population-based cohort | 4,228                  | 2,005   | 758            | 2,223   | 66.2 (62.1-71.5)                   | 65.6 (61.4-71.2) | 67.3 (62.5-73.2) | 66.6 (62.7-71.6) | 0.09 (-3.85-1.27)    |
| TAMPERE              | Finland   | 1993-2008 | Population-based        | 2,754                  | 2,754   | 1,642          | -       | 67.5 (63.0-73.1)                   | 67.5 (63.0-73.1) | 68.7 (63.7-74.6) | -                | 0.19 (-0.64-1.05)    |
| UKGPCS               | UK        | 1993-2011 | Hospital recruitment    | 5,287                  | 4,497   | 3,083          | 790     | 60.3 (57.0-68.8)                   | 62.9 (58.0-70.0) | 63.8 (58.4-70.8) | 56.0 (53.0-59.0) | 0.18 (-2.31-1.35)    |
| ULM                  | Germany   | 1998-2007 | Hospital recruitment    | 800                    | 592     | 406            | 208     | 63.1 (57.6-68.0)                   | 63.8 (59.6-68.2) | 64.1 (60.1-68.4) | 58.0 (49.0-67.0) | 0.16 (-0.86-1.30)    |
| UTAH                 | USA       | 1991-2007 | Population-based        | 685                    | 440     | 68             | 245     | 64.0 (57.0-71.0)                   | 63.0 (56.5-68.0) | 64.0 (57.0-71.0) | 68.0 (60.0-74.0) | 0.16 (-0.83-1.07)    |
| WUGS                 | USA       | 2004-2011 | Hospital recruitment    | 944                    | 944     | 592            | -       | 61.0 (56.0-66.0)                   | 61.0 (56.0-66.0) | 62.0 (56.0-67.0) | -                | 0.29 (-0.62-2.43)    |
| All                  |           |           |                         | 31,747                 | 18,868  | 10,635         | 12,879  | 64.0 (58.2-70.1)                   | 65.1 (59.9-70.5) | 66.0 (60.1-71.3) | 62.0 (55.0-69.6) | 0.12 (-3.85-2.43)    |
| Validation Set       |           |           |                         |                        |         |                |         |                                    |                  |                  |                  |                      |
| ProtecT <sup>a</sup> | UK        | 2001-2009 | Population-based cohort | 6,411                  | 1,583   | 628            | 4,828   | 60.0 (55.7-64.4)                   | 63.4 (59.0-67.0) | 64.3 (60.2-67.5) | 59.0 (55.0-63.0) | 0.06 (-4.13-1.09)    |

<sup>a</sup>Includes the 31 cases and 3,364 controls who participated in both ProtecT and UKGPCS. <sup>b</sup>Case-control design unless otherwise specified. More detailed descriptions of each study are provided in the supplementary material from the original iCOGS publication<sup>1</sup>



**Table B: SNPs in final PHS model**

| SNP name                | log(p-value), univariate <sup>a</sup> | log(p-value), multivariate <sup>b</sup> | $\beta$ from PHS |
|-------------------------|---------------------------------------|-----------------------------------------|------------------|
| rs6983267 <sup>c</sup>  | -53                                   | -25                                     | -0.095           |
| c8_pos128146328         | -48                                   | -19                                     | 0.174            |
| rs10993994 <sup>c</sup> | -48                                   | -30                                     | 0.100            |
| rs9297759               | -42                                   | -22                                     | 0.073            |
| rs11651052              | -37                                   | -37                                     | -0.093           |
| rs12275055              | -35                                   | -9                                      | -0.076           |
| rs7929962               | -32                                   | -7                                      | 0.048            |
| rs7679673 <sup>c</sup>  | -27                                   | -22                                     | -0.066           |
| rs7841060               | -26                                   | -21                                     | -0.082           |
| rs28556804              | -25                                   | -11                                     | 0.077            |
| rs12549761              | -25                                   | -10                                     | 0.054            |
| rs5945631               | -24                                   | -12                                     | -0.192           |
| rs9889335               | -23                                   | -22                                     | 0.077            |
| c8_pos128389706         | -22                                   | -6                                      | 0.066            |
| rs6545977               | -22                                   | -15                                     | -0.066           |
| rs13265330              | -22                                   | -12                                     | -0.060           |
| rs4907775               | -21                                   | -8                                      | 0.131            |
| rs16860513              | -20                                   | -16                                     | 0.198            |
| rs718961                | -20                                   | -6                                      | -0.075           |
| rs9297746               | -19                                   | -7                                      | 0.055            |
| c17_pos44175675         | -19                                   | -10                                     | 0.142            |
| rs17632542              | -18                                   | -9                                      | 0.140            |
| rs232964                | -18                                   | -15                                     | 1.031            |
| c11_pos2181240          | -17                                   | -14                                     | 0.068            |
| rs7725218               | -17                                   | -16                                     | -0.070           |
| rs651164                | -16                                   | -8                                      | -0.050           |
| c3_pos171557211         | -16                                   | -13                                     | 0.073            |
| rs6788616               | -15                                   | -7                                      | -0.040           |
| rs4643253               | -14                                   | -7                                      | 0.052            |
| rs7769879               | -14                                   | -10                                     | 0.054            |
| c10_pos8072007          | -14                                   | -11                                     | -1.530           |
| c3_pos87230612          | -13                                   | -7                                      | -0.115           |
| rs11672691 <sup>c</sup> | -13                                   | -7                                      | -0.059           |
| rs2736108               | -12                                   | -12                                     | 0.050            |
| rs6965016               | -11                                   | -9                                      | -0.052           |
| rs747745                | -11                                   | -5                                      | 0.044            |
| rs3910736               | -11                                   | -9                                      | -0.068           |
| rs11568818 <sup>c</sup> | -10                                   | -9                                      | 0.041            |
| rs17596465              | -10                                   | -7                                      | 0.114            |
| c22_pos41831564         | -10                                   | -6                                      | 0.084            |

|                         |     |     |        |
|-------------------------|-----|-----|--------|
| rs1010                  | -10 | -9  | 0.050  |
| rs2136486               | -9  | -2  | 0.024  |
| rs4919763               | -9  | -11 | -0.050 |
| rs10866528              | -9  | -7  | -0.045 |
| rs3861106               | -9  | -7  | -0.914 |
| rs4809311               | -8  | -6  | 0.049  |
| rs6853490               | -8  | -6  | -0.054 |
| rs13252265              | -8  | -7  | -0.055 |
| rs4857841               | -8  | -7  | 0.029  |
| rs11795627              | -8  | -7  | -0.042 |
| rs7888856               | -7  | -7  | 0.049  |
| rs684232 <sup>c</sup>   | -7  | -8  | -0.039 |
| rs10875943 <sup>c</sup> | -7  | -7  | -0.041 |
| rs10051795              | -7  | -8  | -1.501 |

<sup>a</sup>From trend test for this SNP only on Development Set case/control status.

<sup>b</sup>From logistic regression for prediction of case/control with all SNPs in this table included as predictors, in addition to age and six principal components for European ancestry.

<sup>c</sup>Previously listed among 99 SNPs associated with prostate cancer in GWAS studies<sup>14,15</sup>.

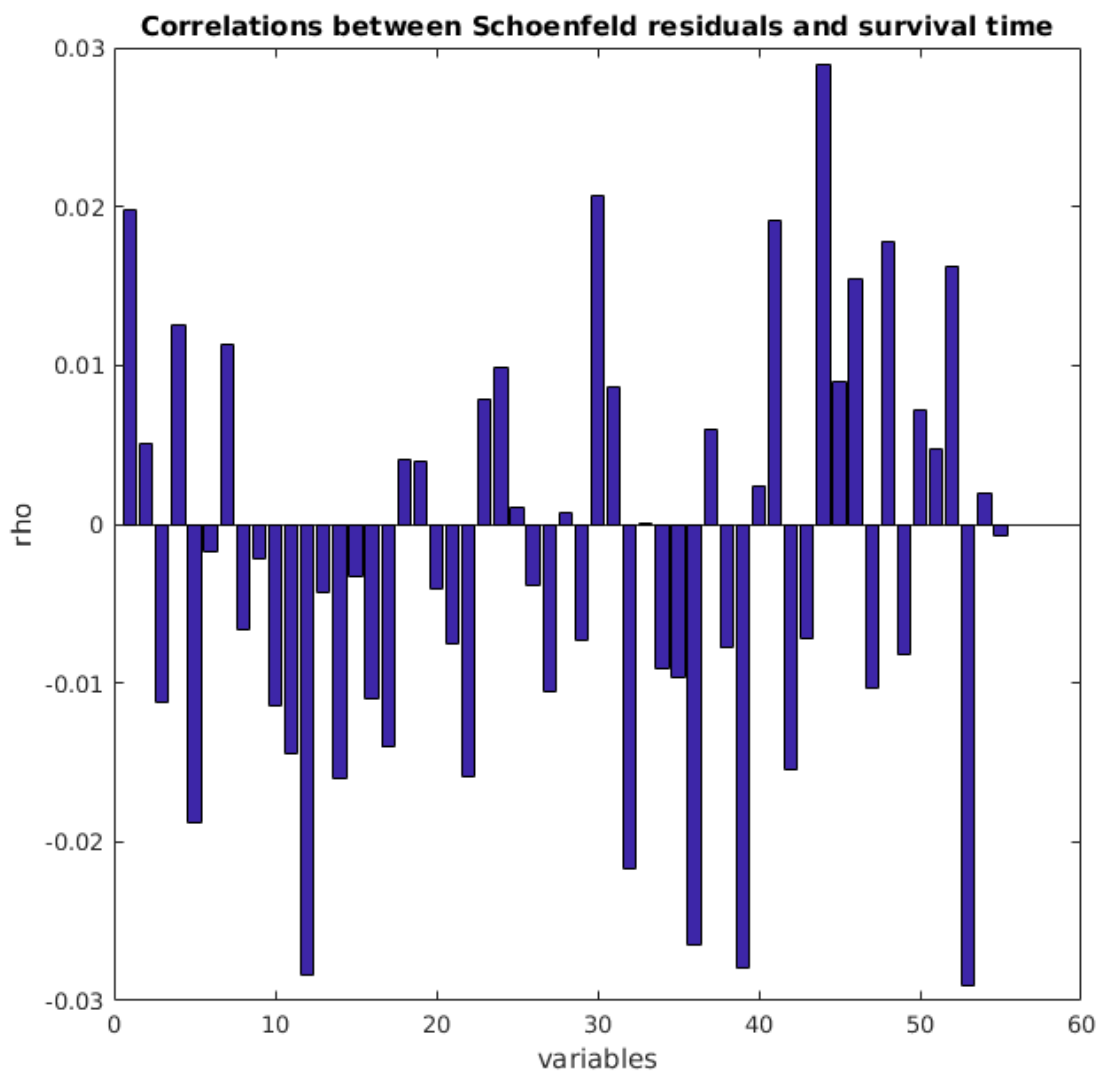

**Figure A:** Each column shows the rho value for Schoenfeld residuals for a single SNP (variable) in the final PHS model.<sup>16</sup>



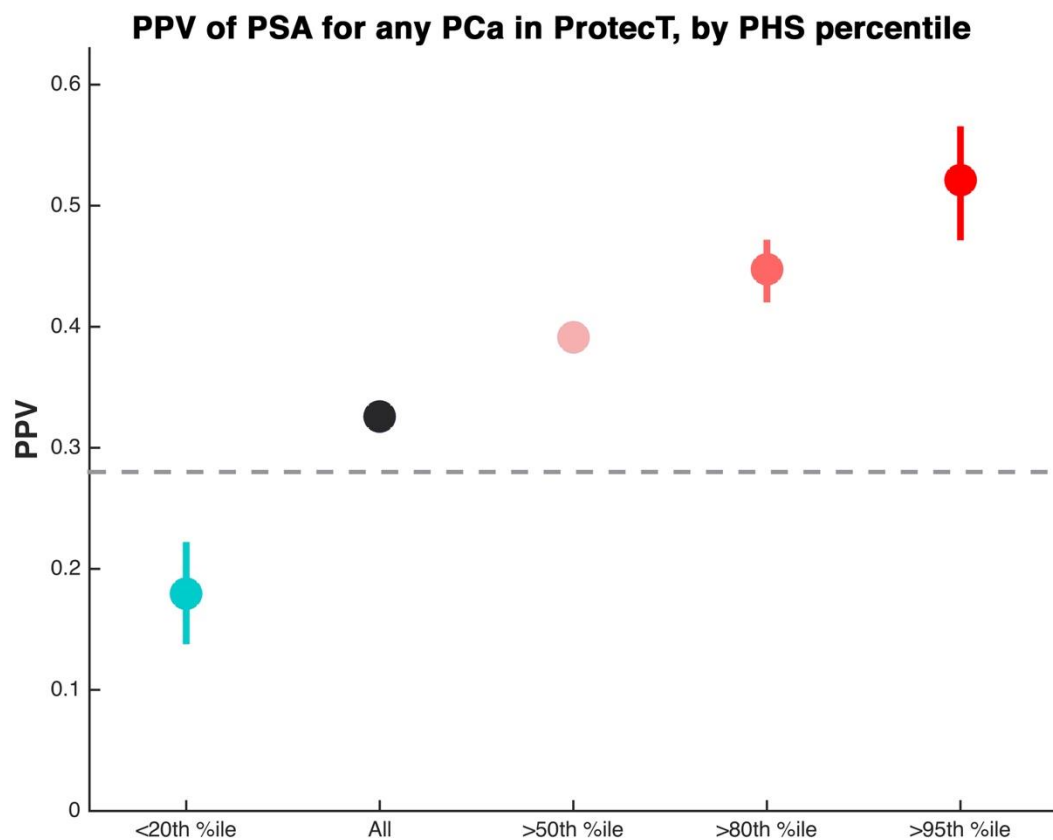

**Figure B:** Positive predictive value (PPV) of PSA testing by PHS percentile thresholds for patients in the Validation Set. This is PPV for any PCa. Percentiles refer to the PHS distribution among young controls in the Development Set. Colored lines are 95% confidence intervals from random samples of cases in the Validation Set (see Methods). For reference, the expected PPV for PSA testing at this threshold is displayed as a gray, dashed line, based on a pooled analysis<sup>17</sup>.

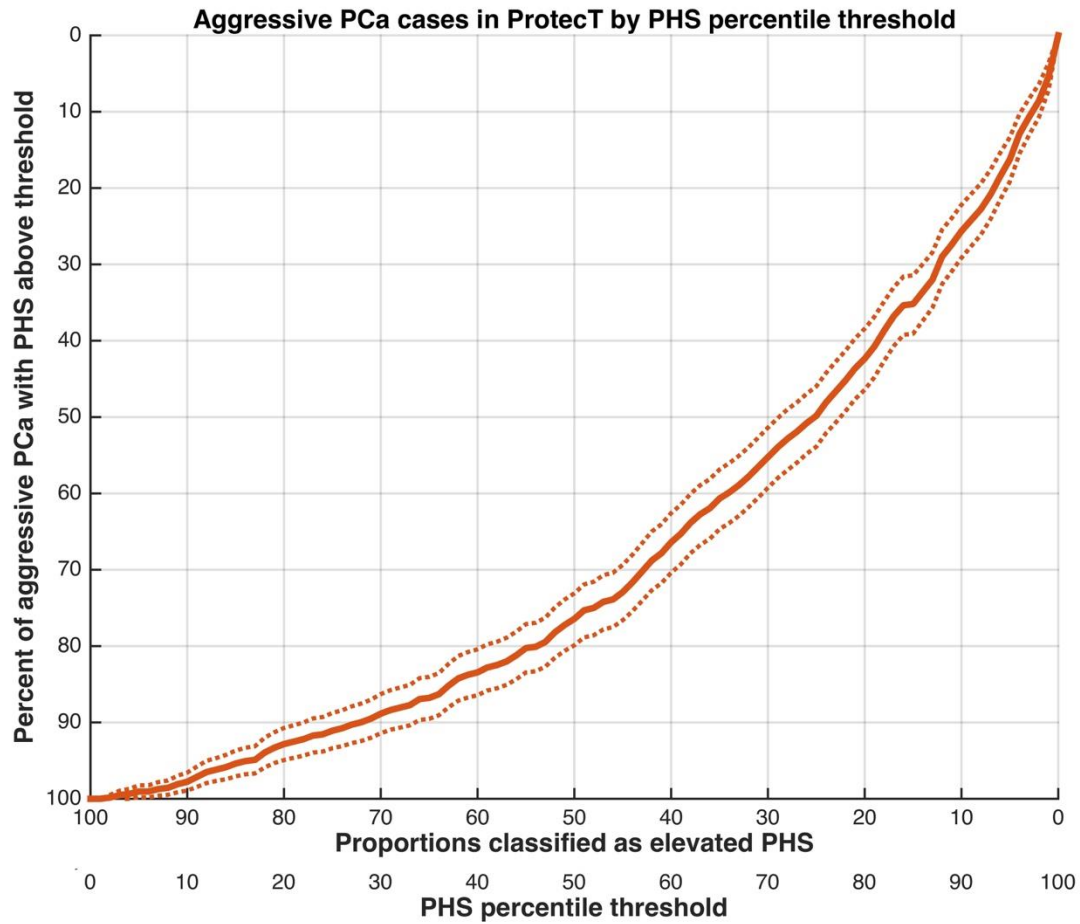

**Figure C:** Lorenz curve to show the percent of the 632 aggressive PCa cases in the Validation Set (ProtecT) that were accounted for with various thresholds for PHS percentile. Dotted lines represent 95% confidence intervals calculated via 1,000 bootstrap samples of 632 aggressive cases. For example, the upper quintile of PHS (20 on upper x-axis, 80<sup>th</sup> PHS percentile) accounted for approximately 42% of all aggressive cases in the Validation Set.

## References from Supplementary Material

- 1 Eeles RA, Olama AAA, Benlloch S, *et al.* Identification of 23 new prostate cancer susceptibility loci using the iCOGS custom genotyping array. *Nat Genet* 2013; **45**: 385–91.
- 2 Eeles RA, Kote-Jarai Z, Al Olama AA, *et al.* Identification of seven new prostate cancer susceptibility loci through a genome-wide association study. *Nat Genet* 2009; **41**: 1116–21.
- 3 Siegel RL, Miller KD, Jemal A. Cancer statistics, 2016. *CA Cancer J Clin* 2016; **66**: 7–30.
- 4 Desikan RS, Fan CC, Wang Y, *et al.* Personalized genetic assessment of age associated Alzheimers disease risk. *BioRxiv - Press PLOS Med* 2016; : 74864.
- 5 Borgan O, Goldstein L, Langholz B. Methods for the Analysis of Sampled Cohort Data in the Cox Proportional Hazards Model. *Ann Stat* 1995; **23**: 1749–78.
- 6 Lane JA, Donovan JL, Davis M, *et al.* Active monitoring, radical prostatectomy, or radiotherapy for localised prostate cancer: study design and diagnostic and baseline results of the ProtecT randomised phase 3 trial. *Lancet Oncol* 2014; **15**: 1109–18.
- 7 Therneau TM, Li H. Computing the Cox Model for Case Cohort Designs. *Lifetime Data Anal*; **5**: 99–112.
- 8 R Core Team. R: A Language and Environment for Statistical Computing. Vienna, Austria: R Foundation for Statistical Computing, 2015 <https://www.R-project.org/>.
- 9 Therneau TM, Grambsch PM. Modeling survival data: extending the Cox model. New York: Springer, 2000.
- 10 Siegel R, Ward E, Brawley O, Jemal A. Cancer statistics, 2011. *CA Cancer J Clin* 2011; **61**: 212–36.
- 11 Jemal A, Siegel R, Ward E, *et al.* Cancer Statistics, 2006. *CA Cancer J Clin* 2006; **56**: 106–30.
- 12 Greenlee RT, Hill-Harmon MB, Murray T, Thun M. Cancer Statistics, 2001. *CA Cancer J Clin* 2001; **51**: 15–36.
- 13 Arias E. United States life tables, 2008. Hyattsville, MD: National Center for Health Statistics, 2012 [http://www.cdc.gov/nchs/data/nvsr/nvsr61/nvsr61\\_03.pdf](http://www.cdc.gov/nchs/data/nvsr/nvsr61/nvsr61_03.pdf).
- 14 Eeles R, Goh C, Castro E, *et al.* The genetic epidemiology of prostate cancer and its clinical implications. *Nat Rev Urol* 2014; **11**: 18–31.
- 15 Al Olama AA, Kote-Jarai Z, Berndt SI, *et al.* A meta-analysis of 87,040 individuals identifies 23 new susceptibility loci for prostate cancer. *Nat Genet* 2014; **46**: 1103–9.
- 16 Schoenfeld D. Partial residuals for the proportional hazards regression model. *Biometrika* 1982; **69**: 239–41.
- 17 Wolf AMD, Wender RC, Etzioni RB, *et al.* American Cancer Society Guideline for the Early Detection of Prostate Cancer: Update 2010. *CA Cancer J Clin* 2010; **60**: 70–98.
